# Supplementary material
Source: publisher site journal article supplement (https://www.dovepress.com/article/254944)

**Supplementary figure S1 PTCSC3 overexpression caused the inhibited proliferation of gastric cancer cells while HULC overexpression reversed.** Compared with two control groups (control, C; negative control, NC), PTCSC3 overexpression led to inhibited, while HULC overexpression led to enhanced proliferation of gastric cancer cells (*p < 0.05).


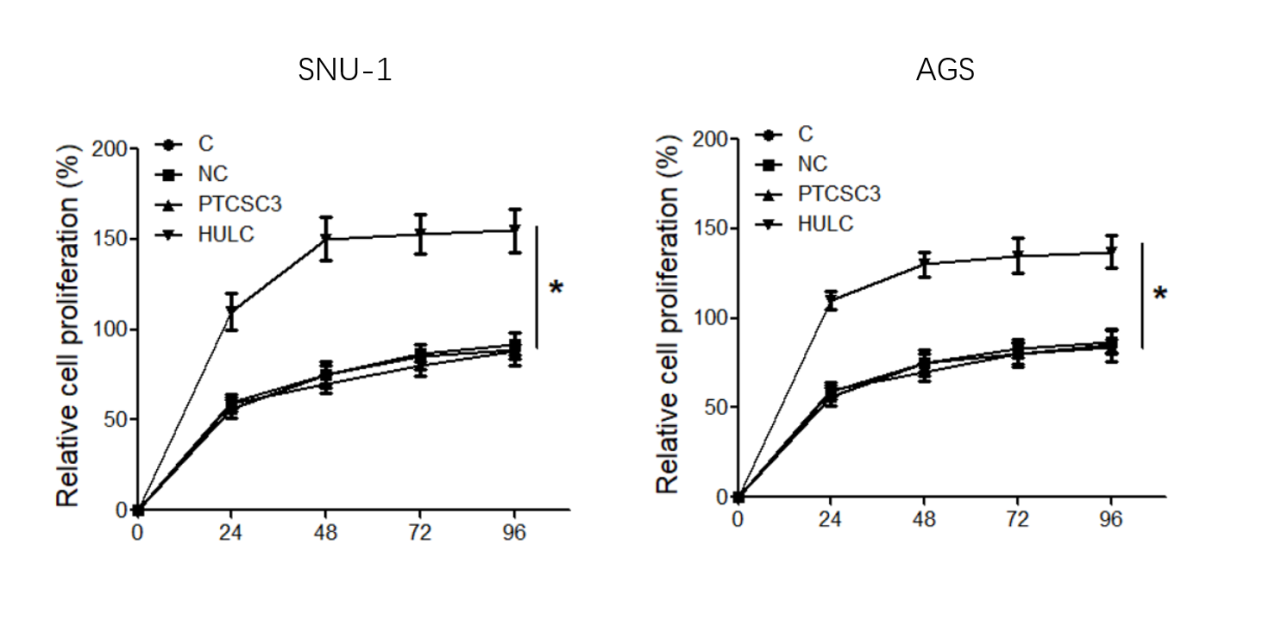

Supplement: Supplementary file 1 [file get_supplementary_file.php]
